# Supplementary material for: Stimulation of microtubule-based transport by nucleation of microtubules on pigment granules
Source: PubMed Central journal article supplement — Mol Biol Cell. 2017 Jun 1;28(11):1418–25. doi: 10.1091/mbc.E16-08-0571 (PMC5449142; doi:10.1091/mbc.e16-08-0571), 2017-06-01
Supplement: supp_E16-08-0571v1_CombinedSupMats.pdf [file supp_E16-08-0571v1_CombinedSupMats.pdf]

# Supplemental Materials

*Molecular Biology of the Cell*

Semenova et al.
